# Supplementary material
Source: HighWire-hosted journal article supplement (http://cmajopen.ca/highwire/filestream/81309/field_highwire_adjunct_files/2/2018-0211-original-submission.pdf)
Supplement: 2018-0211-original-submission.pdf [file 2018-0211-original-submission.pdf]

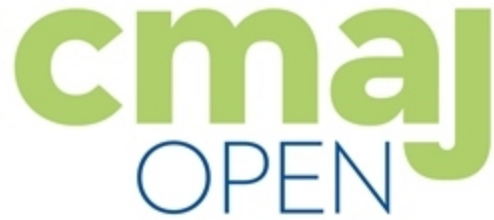

**Improving transfusion appropriateness through an online educational module: a controlled before-after quality improvement study**

|                               |                                                                                                                                                                                                                                                                                                                                                                                                                                                                                                                                                                                                                                                                                                                                                                                                                                                                                                                                                                                                                                                                                                                                                                                                                                                                                                                                                                                                                                                                                                                                                                                                                         |
|-------------------------------|-------------------------------------------------------------------------------------------------------------------------------------------------------------------------------------------------------------------------------------------------------------------------------------------------------------------------------------------------------------------------------------------------------------------------------------------------------------------------------------------------------------------------------------------------------------------------------------------------------------------------------------------------------------------------------------------------------------------------------------------------------------------------------------------------------------------------------------------------------------------------------------------------------------------------------------------------------------------------------------------------------------------------------------------------------------------------------------------------------------------------------------------------------------------------------------------------------------------------------------------------------------------------------------------------------------------------------------------------------------------------------------------------------------------------------------------------------------------------------------------------------------------------------------------------------------------------------------------------------------------------|
| Journal:                      | <i>CMAJ Open</i>                                                                                                                                                                                                                                                                                                                                                                                                                                                                                                                                                                                                                                                                                                                                                                                                                                                                                                                                                                                                                                                                                                                                                                                                                                                                                                                                                                                                                                                                                                                                                                                                        |
| Manuscript ID                 | CMAJOpen-2018-0211                                                                                                                                                                                                                                                                                                                                                                                                                                                                                                                                                                                                                                                                                                                                                                                                                                                                                                                                                                                                                                                                                                                                                                                                                                                                                                                                                                                                                                                                                                                                                                                                      |
| Manuscript Type:              | Before and After                                                                                                                                                                                                                                                                                                                                                                                                                                                                                                                                                                                                                                                                                                                                                                                                                                                                                                                                                                                                                                                                                                                                                                                                                                                                                                                                                                                                                                                                                                                                                                                                        |
| Date Submitted by the Author: | 28-Dec-2018                                                                                                                                                                                                                                                                                                                                                                                                                                                                                                                                                                                                                                                                                                                                                                                                                                                                                                                                                                                                                                                                                                                                                                                                                                                                                                                                                                                                                                                                                                                                                                                                             |
| Complete List of Authors:     | Lee, Todd; Royal Victoria Hospital, Internal Medicine and Infectious Diseases<br>Murray, Jennifer<br>McDonald, Emily; McGill University, Internal Medicine                                                                                                                                                                                                                                                                                                                                                                                                                                                                                                                                                                                                                                                                                                                                                                                                                                                                                                                                                                                                                                                                                                                                                                                                                                                                                                                                                                                                                                                              |
| More Detailed Keywords:       | Transfusion, Appropriateness, Educational intervention, Quality improvement, Patient safety                                                                                                                                                                                                                                                                                                                                                                                                                                                                                                                                                                                                                                                                                                                                                                                                                                                                                                                                                                                                                                                                                                                                                                                                                                                                                                                                                                                                                                                                                                                             |
| Keywords:                     | Hematology, Medical education, Safety                                                                                                                                                                                                                                                                                                                                                                                                                                                                                                                                                                                                                                                                                                                                                                                                                                                                                                                                                                                                                                                                                                                                                                                                                                                                                                                                                                                                                                                                                                                                                                                   |
| Abstract:                     | <p>Background: Many studies have failed to show clinical benefits from liberal transfusion of packed red blood cells. Professional societies have made value-based statements aimed at reducing inappropriate transfusions; however, translating these statements into changes in clinical practice is challenging. We sought to determine if mandatory completion of an accredited free online training course would improve transfusion knowledge amongst medical residents and increase transfusion appropriateness.</p> <p>Methods: We describe a controlled before-after evaluation of two medical clinical teaching units (47 and 45 beds respectively) at a university hospital centre in Montréal, Canada. Fifty-five resident physician pre and post-test scores were compared and the impact on transfusion appropriateness was evaluated by comparing the proportion occurring below a hemoglobin of 80g/L.</p> <p>Results: Of 55 resident physicians, 53 completed the training (96.4%). The median pre-test score was 50% (IQR 40%-60%), post-test one 90% (IQR 80%-90%) and post-test two 80% (IQR 80%-90%), <math>p &lt; 0.0001</math>. With training, the proportion of transfusions below 80g/L increased from 80.1% to 86.9% (<math>p = 0.038</math>) on the intervention unit; on the control unit it decreased from 75.6% to 71.1% (<math>p = 0.37</math>). The proportion of transfusions occurring below 80g/L prior to the intervention did not differ significantly between groups (intervention 80.1% vs. control 75.6%, <math>p = 0.07</math>); following the intervention, a significant</p> |

1  
2  
3  
4  
5  
6  
7  
8  
9  
10  
11  
12  
13  
14  
15  
16  
17  
18  
19  
20  
21  
22  
23  
24  
25  
26  
27  
28  
29  
30  
31  
32  
33  
34  
35  
36  
37  
38  
39  
40  
41  
42  
43  
44  
45  
46  
47  
48  
49  
50  
51  
52  
53  
54  
55  
56  
57  
58  
59  
60

|  |                                                                                                                                                                                                                                                                                                                                                                                                     |
|--|-----------------------------------------------------------------------------------------------------------------------------------------------------------------------------------------------------------------------------------------------------------------------------------------------------------------------------------------------------------------------------------------------------|
|  | <p>difference was observed (86.9% vs. 71.1%, <math>p=0.002</math>) in favor of the intervention unit.</p> <p>Interpretation: Mandatory training in transfusion appropriateness using an online educational module resulted in significant improvements in transfusion knowledge amongst resident physicians and is a low-cost educational initiative for improving transfusion appropriateness.</p> |
|  |                                                                                                                                                                                                                                                                                                                                                                                                     |

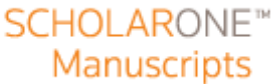

STROBE Statement—Checklist of items that should be included in reports of *cohort studies*

|                              | Item No | Recommendation                                                                                                                                                                                                                                                                                                         | Page No        |
|------------------------------|---------|------------------------------------------------------------------------------------------------------------------------------------------------------------------------------------------------------------------------------------------------------------------------------------------------------------------------|----------------|
| <b>Title and abstract</b>    | 1       | (a) Indicate the study's design with a commonly used term in the title or the abstract<br>(b) Provide in the abstract an informative and balanced summary of what was done and what was found                                                                                                                          | a) 1<br>b) 2/3 |
| <b>Introduction</b>          |         |                                                                                                                                                                                                                                                                                                                        |                |
| Background/rationale         | 2       | Explain the scientific background and rationale for the investigation being reported                                                                                                                                                                                                                                   | 4              |
| Objectives                   | 3       | State specific objectives, including any prespecified hypotheses                                                                                                                                                                                                                                                       | 4              |
| <b>Methods</b>               |         |                                                                                                                                                                                                                                                                                                                        |                |
| Study design                 | 4       | Present key elements of study design early in the paper                                                                                                                                                                                                                                                                | 5              |
| Setting                      | 5       | Describe the setting, locations, and relevant dates, including periods of recruitment, exposure, follow-up, and data collection                                                                                                                                                                                        | 5              |
| Participants                 | 6       | (a) Give the eligibility criteria, and the sources and methods of selection of participants. Describe methods of follow-up<br>(b) For matched studies, give matching criteria and number of exposed and unexposed                                                                                                      | 5              |
| b) Variables                 | 7       | Clearly define all outcomes, exposures, predictors, potential confounders, and effect modifiers. Give diagnostic criteria, if applicable                                                                                                                                                                               | 6              |
| Data sources/<br>measurement | 8*      | For each variable of interest, give sources of data and details of methods of assessment (measurement). Describe comparability of assessment methods if there is more than one group                                                                                                                                   | 6              |
| Bias                         | 9       | Describe any efforts to address potential sources of bias                                                                                                                                                                                                                                                              | 7              |
| Study size                   | 10      | Explain how the study size was arrived at                                                                                                                                                                                                                                                                              | 7              |
| Quantitative variables       | 11      | Explain how quantitative variables were handled in the analyses. If applicable, describe which groupings were chosen and why                                                                                                                                                                                           | 8              |
| Statistical methods          | 12      | (a) Describe all statistical methods, including those used to control for confounding<br>(b) Describe any methods used to examine subgroups and interactions<br>(c) Explain how missing data were addressed<br>(d) If applicable, explain how loss to follow-up was addressed<br>(e) Describe any sensitivity analyses | 8              |
| <b>Results</b>               |         |                                                                                                                                                                                                                                                                                                                        |                |
| Participants                 | 13*     | (a) Report numbers of individuals at each stage of study—eg numbers potentially eligible, examined for eligibility, confirmed eligible, included in the study, completing follow-up, and analysed<br>(b) Give reasons for non-participation at each stage<br>(c) Consider use of a flow diagram                        | 8              |
| Descriptive data             | 14*     | (a) Give characteristics of study participants (eg demographic, clinical, social) and information on exposures and potential confounders<br>(b) Indicate number of participants with missing data for each variable of interest<br>(c) Summarise follow-up time (eg, average and total amount)                         | 8              |
| Outcome data                 | 15*     | Report numbers of outcome events or summary measures over time                                                                                                                                                                                                                                                         | 8              |

|    |                          |    |                                                                                                                                                                                                              |    |
|----|--------------------------|----|--------------------------------------------------------------------------------------------------------------------------------------------------------------------------------------------------------------|----|
| 1  | Main results             | 16 | (a) Give unadjusted estimates and, if applicable, confounder-adjusted estimates and their precision (eg, 95% confidence interval). Make clear which confounders were adjusted for and why they were included | 8  |
| 2  |                          |    | (b) Report category boundaries when continuous variables were categorized                                                                                                                                    |    |
| 3  |                          |    | (c) If relevant, consider translating estimates of relative risk into absolute risk for a meaningful time period                                                                                             |    |
| 4  | Other analyses           | 17 | Report other analyses done—eg analyses of subgroups and interactions, and sensitivity analyses                                                                                                               | 9  |
| 5  | <b>Discussion</b>        |    |                                                                                                                                                                                                              |    |
| 6  | Key results              | 18 | Summarise key results with reference to study objectives                                                                                                                                                     | 9  |
| 7  | Limitations              | 19 | Discuss limitations of the study, taking into account sources of potential bias or imprecision. Discuss both direction and magnitude of any potential bias                                                   | 12 |
| 8  | Interpretation           | 20 | Give a cautious overall interpretation of results considering objectives, limitations, multiplicity of analyses, results from similar studies, and other relevant evidence                                   | 12 |
| 9  | Generalisability         | 21 | Discuss the generalisability (external validity) of the study results                                                                                                                                        | 12 |
| 10 | <b>Other information</b> |    |                                                                                                                                                                                                              |    |
| 11 | Funding                  | 22 | Give the source of funding and the role of the funders for the present study and, if applicable, for the original study on which the present article is based                                                | 14 |

\*Give information separately for exposed and unexposed groups.

**Note:** An Explanation and Elaboration article discusses each checklist item and gives methodological background and published examples of transparent reporting. The STROBE checklist is best used in conjunction with this article (freely available on the Web sites of PLoS Medicine at <http://www.plosmedicine.org/>, Annals of Internal Medicine at <http://www.annals.org/>, and Epidemiology at <http://www.epidem.com/>). Information on the STROBE Initiative is available at <http://www.strobe-statement.org>.

1  
2  
3 1 **Improving transfusion appropriateness through an online educational module: a controlled**  
4  
5 2  
6 **before-after quality improvement study**

7  
8 3 Todd C. Lee MD MPH<sup>1,2</sup>, Jennifer Murray MScPH<sup>1</sup>, Emily G. McDonald MD MSc<sup>1,2</sup>  
9  
10 4

11  
12 5 <sup>1</sup>Clinical Practice Assessment Unit, Department of Medicine, McGill University Health Centre,  
13  
14 Montréal, Canada  
15 6

16  
17 7 <sup>2</sup>Division of General internal medicine, Department of Medicine, McGill University Health  
18  
19 Centre, Montréal, Canada  
20 8

21  
22 9  
23  
24 10 Correspondence and Reprint Requests to:

25 11 Emily G. McDonald

26 12 Royal Victoria Hospital

27 13 1001 Decarie Boulevard Room D5.5843

28 14 Montréal, QC Canada H4A 3J1

29 15 Tel: (514) 934-1934, local 34673

30 16 Fax: (514) 843-1676

31 17 Email: [emily.mcdonald@mcgill.ca](mailto:emily.mcdonald@mcgill.ca)  
32 18

33  
34 19 Word count:

35 20 Abstract: 248

36 21 Text: 2374  
37 22

38  
39 23 Contributor statement: EGM and TCL contributed significantly to the conception and design of  
40 24 the study; EGM, TCL and JM contributed to data acquisition, drafting and revising of the  
41 25 manuscript, and gave final permission for the submission. TCL performed the statistical analysis  
42 26 and acts as the guarantor of the work.  
43 27  
44 28  
45  
46  
47 29  
48  
49  
50  
51  
52  
53  
54  
55  
56  
57  
58  
59  
60

1  
2  
3 **30 Abstract:**  
4

5 31  
6

7 **32 Background:** Many studies have failed to show clinical benefits from liberal transfusion of  
8  
9  
10 33 packed red blood cells. Professional societies have made value-based statements aimed at  
11  
12 34 reducing inappropriate transfusions; however, translating these statements into changes in  
13  
14 35 clinical practice is challenging. We sought to determine if mandatory completion of an  
15  
16 36 accredited free online training course would improve transfusion knowledge amongst medical  
17  
18 37 residents and increase transfusion appropriateness.  
19  
20

21 **38 Methods:** We describe a controlled before-after evaluation of two medical clinical teaching units  
22  
23  
24 39 (47 and 45 beds respectively) at a university hospital centre in Montréal, Canada. Fifty-five  
25  
26 40 resident physician pre and post-test scores were compared and the impact on transfusion  
27  
28 41 appropriateness was evaluated by comparing the proportion occurring below a hemoglobin of  
29  
30  
31 42 80g/L.  
32

33 **43 Results:** Of 55 resident physicians, 53 completed the training (96.4%). The median pre-test  
34  
35 44 score was 50% (IQR 40%-60%), post-test one 90% (IQR 80%-90%) and post-test two 80% (IQR  
36  
37 45 80%-90%),  $p < 0.0001$ . With training, the proportion of transfusions below 80g/L increased from  
38  
39 46 80.1% to 86.9% ( $p = 0.038$ ) on the intervention unit; on the control unit it decreased from 75.6%  
40  
41  
42 47 to 71.1% ( $p = 0.37$ ). The proportion of transfusions occurring below 80g/L prior to the  
43  
44 48 intervention did not differ significantly between groups (intervention 80.1% vs. control 75.6%,  
45  
46 49  $p = 0.07$ ); following the intervention, a significant difference was observed (86.9% vs. 71.1%,  
47  
48  
49 50  $p = 0.002$ ) in favor of the intervention unit.  
51  
52  
53  
54  
55  
56  
57  
58  
59  
60

1  
2  
3 51 **Interpretation:** Mandatory training in transfusion appropriateness using an online educational  
4  
5 52 module resulted in significant improvements in transfusion knowledge amongst resident  
6  
7 53 physicians and is a low-cost educational initiative for improving transfusion appropriateness.  
8  
9  
10 54

11  
12  
13  
14  
15  
16  
17  
18  
19  
20  
21  
22  
23  
24  
25  
26  
27  
28  
29  
30  
31  
32  
33  
34  
35  
36  
37  
38  
39  
40  
41  
42  
43  
44  
45  
46  
47  
48  
49  
50  
51  
52  
53  
54  
55  
56  
57  
58  
59  
60

Confidential

## 55 **Introduction**

56 The Choosing Wisely campaign contains more than seventy lists of common tests and  
57 procedures that specialty societies have created to improve healthcare through the avoidance of  
58 low-value practices(1). The campaign has evolved in order to place a stronger emphasis on  
59 implementation and the evaluation of clinically meaningful interventions(2). In order to effect  
60 change, it is generally accepted that the movement must go beyond statements of avoidance;  
61 toolkits outlining practical implementation strategies may be one means of accomplishing  
62 this(3). One important recommendation that would benefit from this approach, and is shared by a  
63 number of professional societies, recommends the avoidance of transfusions in stable patients for  
64 arbitrary hemoglobin values. Patient care can benefit in a multitude of ways from restrictive  
65 transfusion strategies. In most circumstances, restrictive transfusion practices have been shown  
66 to be as safe, or safer than, liberal transfusions (4-7). In addition, the frequency of adverse events  
67 related to blood products is likely underreported (8), packed red cells indirectly cost  
68 approximately \$1200 (CAD) per unit transfused (9), blood products can be a limited resource in  
69 smaller centres and packed red cells are often overused (10-13).

70  
71 As one low-cost initial strategy for improving transfusion appropriateness, we sought to  
72 determine if the universal, mandatory completion of a freely-available, accredited, online  
73 educational module *Bloody Easy Lite for Physicians* (14) could lead to improvements in  
74 transfusion appropriateness in a pragmatic before-and-after study design.

## 76 **Methods**

### 77 *Study Sites*



1  
2  
3 78 This study was performed on the medical clinical teaching units (CTU) of the Royal Victoria  
4  
5 79 Hospital (47 beds). As a comparator, we used a 45 bed CTU at the Montreal General Hospital as  
6  
7  
8 80 a contemporary control. These two hospitals belong to the McGill University Health Centre,  
9  
10 81 which is an 832-bed tertiary care center in Montréal, Canada. Both medical CTUs predominantly  
11  
12 82 admit acutely ill patients via the emergency department who do not require surgery, acute  
13  
14 83 chemotherapy, critical care, or specialized cardiac care. Each CTU cares for a similar proportion  
15  
16  
17 84 of patients with coronary artery disease, congestive heart failure, and gastrointestinal  
18  
19 85 hemorrhage.  
20

21  
22 86  
23  
24 87 *Intervention*

25  
26 88 At baseline, all resident physicians in the first three years of the internal medicine core residency  
27  
28 89 program receive a one-hour session, given every two years, on the management of transfusion  
29  
30  
31 90 reactions, but there is little focus placed on transfusion appropriateness. Beginning July 1, 2015,  
32  
33 91 in addition to the standard one-hour session, resident physicians working on the intervention unit  
34  
35 92 were required to complete a free online module called *Bloody Easy Lite for Physicians* (available  
36  
37 93 from the Ontario Regional Blood Coordinating Network website at  
38  
39  
40 94 <http://belite.transfusionontario.org/>). This Royal College of Physicians and Surgeons of Canada  
41  
42 95 accredited online learning program provides education about transfusion medicine including:  
43  
44 96 pre-transfusion testing, indications for transfusion, transfusion appropriateness (e.g. thresholds  
45  
46 97 for transfusion), and the diagnosis and management of adverse transfusion reactions. It features  
47  
48 98 a pre-test and two post-test evaluations of performance for the individual learner to gauge their  
49  
50 99 own performance. Completion was required before the end of the first week of their first CTU  
51  
52  
53  
54 100 rotation.  
55  
56  
57  
58  
59  
60

1  
2  
3 101  
4  
5 102 On the intervention unit medical students were encouraged to take the module but were not  
6  
7  
8 103 required to do so as they cannot order transfusions. Faculty members attending on the  
9  
10 104 intervention CTU were also invited to take the module at their own discretion.  
11

12 105  
13

14 106 *Data sources*

15  
16  
17 107 Transfusion data was obtained from the blood bank through the Canadian Blood Services system  
18  
19 108 *TRACE LINE*, which is an FDA licensed software designed for large scale hospital transfusion  
20  
21 109 services and used in over 80 hospitals in Québec. Individual transfusions were manually cross-  
22  
23 110 referenced with corresponding pre-transfusion hemoglobin values using the laboratory  
24  
25 111 information system, OACIS. The earliest data available were from April 1, 2013. The most  
26  
27 112 recent hemoglobin value up to 48 hours before transfusion was extracted and used in the  
28  
29 113 adjudication of the primary outcome. In the rare cases where there was no hemoglobin measured  
30  
31 114 between two or more transfused units, we inferred the subsequent pre-transfusion hemoglobin by  
32  
33 115 adding 10g/L to the initial pre-transfusion value for each unit transfused. Two patients who  
34  
35 116 received 4 or more units of packed red blood cells within a single day for significant bleeding  
36  
37 117 were excluded from the analysis.  
38  
39  
40  
41

42 118  
43

44 119 *Outcomes*

45  
46  
47 120 Based on high quality evidence, the Clinical Practice Guideline on red blood cell transfusion  
48  
49 121 from the American Association of Blood Banks strongly recommends (4) “adhering to a  
50  
51 122 restrictive transfusion strategy (70 to 80 g/L) in hospitalized, stable patients.” In conjunction  
52  
53 123 with Choosing Wisely Canada (15) and the Ontario Regional Blood Coordinating Network, we  
54  
55  
56  
57  
58  
59  
60

1  
2  
3 124 decided on a value of 80g/L as being a reasonable indicator of potentially inappropriate  
4  
5 125 transfusions. Thus, while 80 g/L does not imply a clinical threshold for transfusion, we used this  
6  
7  
8 126 value for detecting potentially inappropriate transfusions. Secondary outcomes were the rates of  
9  
10 127 transfusions standardized per 100 admissions and per 1,000 patient days.

11  
12 128  
13  
14  
15 129 To evaluate how well the primary outcome served as a surrogate for potentially inappropriate  
16  
17 130 transfusions, two authors (TCL and EGM, both staff general internists) blinded to transfusion  
18  
19 131 date and location, reviewed a convenience sample of 75 charts of patients who were transfused  
20  
21 132 with hemoglobin values above 80g/L. Transfusions above 80g/L were judged as inappropriate in  
22  
23 133 non-bleeding, hemodynamically stable patients, and in the absence of active cardiac ischemia  
24  
25 134 documented in the medical record. Consensus was reached through discussion in cases of  
26  
27  
28 135 disagreement.

29  
30  
31 136

32  
33 137 *Statistical Analysis*

34  
35 138 Based on a previous audit, about 70-75% of transfusions on medicine were occurring at a  
36  
37 139 threshold of less than 80 g/L (local unpublished data). Whereas a comparable tertiary care  
38  
39 140 hospital in Ontario has been able to achieve 80% of transfusions below a threshold of 80 g/L  
40  
41 141 based on a 2014 audit of pRBC transfusions from the Ontario Regional Blood Coordinating  
42  
43 142 Network. In order to have 80% power to demonstrate an absolute difference of 8% in the  
44  
45 143 proportion of transfusions occurring below 80g/L, we calculated that we would need  
46  
47 144 approximately 125 transfusions. Given an average of 25 transfusions per month, we estimated  
48  
49 145 this would take six months and allowed an extra month in case of lower than expected rates. We  
50  
51  
52 146 therefore compared the time period before (April 1, 2013 – June 30, 2015) and after (July 1,

1  
2  
3 147 2015 – January 31, 2016) within the intervention site, as well as a comparison to the control site.  
4  
5 148 Comparisons of proportions were made using Chi-Square. Comparisons of transfusion rates were  
6  
7 149 made using a Z-test of the summary rate difference using inverse variance weights. Comparisons  
8  
9  
10 150 between anonymized trainee pre-test and post-test performances were performed using a  
11  
12 151 Wilcoxon rank sum on the paired data.  
13  
14  
15 152

### 16 153 *Ethics*

17 154  
18  
19  
20  
21 155 This study was approved by the McGill University Health Centre Research Ethics Board.  
22  
23  
24 156

### 25 26 157 **Results**

27  
28 158 Of 55 resident physicians who worked on the intervention units, 53 successfully completed the  
29  
30 159 training (96.4%) along with four of the fifteen faculty (27%). No faculty or senior residents from  
31  
32 160 the control group received the training; however, thirteen first-year residents from the control  
33  
34 161 hospital did one-month rotations at the intervention site at various times. The median pre-test  
35  
36 162 score was 50% (interquartile range 40%-60%), post-test one 90% (interquartile range 80%-90%)  
37  
38 163 and post-test two 80% (interquartile range 80%-90% ( $p < 0.0001$  for both comparisons).  
39  
40  
41 164

42  
43  
44 165 A total of 1,410 units of blood were transfused over the entire period. The pre and post-  
45  
46 166 intervention data for both units is shown in Table 1. Following the educational intervention, on  
47  
48 167 the intervention unit the proportion of transfusions occurring with a hemoglobin below 80g/L  
49  
50 168 (appropriate) increased from 80.1% to 86.9% ( $p = 0.038$ ) whereas on the control unit it decreased  
51  
52 169 from 75.6% to 71.1% after ( $p = 0.37$ ). Prior to the intervention, the proportion of transfusions  
53  
54  
55  
56  
57  
58  
59  
60

1  
2  
3 170 occurring with a hemoglobin below 80g/L (appropriate) was no different between the  
4  
5 171 intervention site and the control site (80.1% vs. 75.6% respectively,  $p=0.07$ ); following the  
6  
7 172 intervention, there was a significant difference between the intervention and control sites (86.9%  
8  
9 173 vs. 71.1% respectively,  $p=0.002$ ) in favor of the intervention site. This corresponded to an  
10  
11 174 absolute improvement of 6.8% and a relative improvement of 34% in the proportion of  
12  
13 175 transfusions occurring below a hemoglobin of 80 g/L.  
14  
15  
16  
17 176

18  
19 177 Based on a convenience sample of 75 blinded chart reviews, the proportion of inappropriate  
20  
21 178 transfusions occurring above 80g/L was 78.7% (kappa 0.80 for inter-observer agreement),  
22  
23 179 indicating that the majority of transfusions that occurred above this threshold might have been  
24  
25 180 unnecessary and could have been avoided.  
26  
27  
28  
29 181

30  
31 182 In contrast to the above findings, both population-based rates were actually significantly lower at  
32  
33 183 all times in the control unit and the number of transfusions per 100 admissions or per 1,000  
34  
35 184 patient days significantly decreased on the control unit but not on the intervention unit (Table 1).  
36  
37  
38  
39 185

## 40 186 **Interpretation**

41  
42 187  
43 188 In this pragmatic before-after study conducted on our medical CTUs, the mandated completion  
44  
45 189 of *Bloody Easy Lite for Physicians* by all resident physicians was associated with an absolute  
46  
47 190 6.8% and relative 34% improvement in the proportion of transfusions at a hemoglobin below  
48  
49 191 80g/L, with no significant change seen on the contemporary control unit. Uptake of the training  
50  
51 192 module was nearly complete (96%) and transfusion knowledge, as evidenced by standardized  
52  
53 193 post-test performance, was greatly improved compared to baseline. Importantly, the only  
54  
55  
56  
57  
58  
59  
60

1  
2  
3 194 institutional cost associated with this intervention was approximately 60 minutes of resident  
4  
5 195 physician time.

6  
7  
8 196

9  
10 197 On the intervention unit, metrics of transfusions per 100 admissions or per 1,000 patient days did  
11  
12 198 not capture a demonstrable difference in transfusion appropriateness between sites, with a  
13  
14 199 concomitant decrease in both rates seen on the control unit. This highlights the limitations of  
15  
16 200 these and similar metrics for both intra and inter-site comparisons and is important to keep in  
17  
18 201 mind for designing future quality improvement initiatives. These metrics are a measure of rates  
19  
20 202 of transfusion but do not necessarily reflect transfusion appropriateness. A comparison of the  
21  
22 203 pros and cons of different transfusion metrics is available in the supplementary appendix. In our  
23  
24 204 study, on the control unit the number of hematologic and solid organ cancer patients who were  
25  
26 205 admitted decreased around the time of the intervention. This population requires a large number  
27  
28 206 of transfusions, but appropriately-so. Transfusions for 100 admissions may be highest for these  
29  
30 207 patients but also completely appropriate (making the proportion of transfusions below 80g/L a  
31  
32 208 much better metric for appropriateness). Changes in patient acuity and complexity can explain  
33  
34 209 why per-admission/patient day rates decreased on the control unit in the absence of a specific  
35  
36 210 intervention. In further support of this, the proportion of transfusions under 80g/L did not  
37  
38 211 improve on the control unit, because there was no specific change in transfusion behavior,  
39  
40 212 merely fewer overall scenarios potentially requiring transfusion.

41  
42  
43  
44  
45  
46  
47 213

48  
49 214 There have been several publications involving traditional educational interventions to improve  
50  
51 215 transfusion appropriateness ranging from frequent verbal presentations to more formal  
52  
53 216 behavioral interventions, which have had mixed results depending on the training personnel,  
54  
55  
56  
57  
58  
59  
60

1  
2  
3 217 clinical champions, and specific curriculum used (16-19). A recent meta-analysis of behavior  
4  
5 218 modification interventions (including protocols, education, electronic medical record alerts, audit  
6  
7 219 and feedback, and policy interventions) to optimize red blood cell transfusion practices found  
8  
9 220 that use of an intervention decreased the pooled odds of inappropriate transfusion (pooled OR  
10  
11 221 0.46 (95% CI 0.36 to 0.59)(20). The authors noted that no study to date had examined the cost-  
12  
13 222 effectiveness of such interventions.  
14  
15  
16  
17 223

18  
19 224 There are key advantages to the success of the online intervention used in our study: Bloody  
20  
21 225 Easy Lite for Physicians is standardized and accredited; it is self-directed and the trainee can  
22  
23 226 complete it on their own time, including from home; it can easily be used at non-academic  
24  
25 227 institutions; improvement in knowledge can be measured objectively through the scored pre-test  
26  
27 228 and post-test components; and the intervention doesn't require an individual with specialized  
28  
29 229 knowledge to champion the intervention, teach ongoing sessions, or rely on voluntary attendance  
30  
31 230 at rounds. Moreover, if implemented at a more central level, this type of online learning module  
32  
33 231 could be applied systematically across a training program or even an institution or university,  
34  
35 232 promoting change and reaching a larger and broader audience than might be achieved with grand  
36  
37 233 rounds, monthly unit-based teaching sessions, or even specific educational campaigns.  
38  
39  
40  
41  
42 234

43  
44 235 *Limitations:*  
45  
46  
47 236

48  
49 237 It is worth noting that in many studies, multi-modal interventions, especially the subsequent  
50  
51 238 addition of computerized decision support at the time of ordering a transfusion led to even  
52  
53 239 further reductions suggesting this pairing is more effective than educational efforts alone (16-18,  
54  
55  
56  
57  
58  
59  
60

1  
2  
3 240 21). At our institution we currently have no means of implementing such computerized decision  
4  
5 241 support; however, some degree of decision support can even be introduced into paper-based  
6  
7 242 systems with standardized transfusion order forms (22). We tested this intervention on a medical  
8  
9 243 unit where most patients are acutely ill, have a variety of diagnoses and comorbidities, and often  
10  
11 244 require transfusions. If potentially inappropriate transfusions can be limited in this environment,  
12  
13 245 training may prove effective in other inpatient settings as well. Although many previous  
14  
15 246 educational interventions have been described, the use of an online training module that can be  
16  
17 247 accessed from home is relatively novel. The cost of the intervention was negligible given the  
18  
19 248 online training was freely available and each transfusion prevented would have saved on average  
20  
21 249 \$1200. Nonetheless, this was a non-randomized study that was conducted at a single academic  
22  
23 250 health center on a medical teaching unit and the external validity needs to be considered. It is  
24  
25 251 unproven if such an approach would work in centers with more extensive pre-existing  
26  
27 252 transfusion education, on surgical or critical care units, or in non-teaching centers. Also, before-  
28  
29 253 and-after studies have methodological limitations which can raise concerns for internal validity.  
30  
31 254 The use of a contemporary control unit does help strengthen our conclusions and our primary  
32  
33 255 outcome metric is easily obtained and relatively independent of patient volume or case mix.  
34  
35 256 Finally, it should be cautioned that the metric of transfusions below 80g/L is a proxy for  
36  
37 257 appropriateness. Improvements here may not necessarily translate into reductions in harder  
38  
39 258 outcomes such as transfusion-associated adverse events which are too rare for a study of this size  
40  
41 259 to detect.

42  
43  
44  
45  
46  
47  
48  
49 26050  
51  
52 261 *Conclusion*53  
54 26255 263 When it comes to the transfusion of packed red cells, interventions to improve appropriateness  
56  
57  
58  
59  
60



1  
2  
3 264 are necessary and can have an important impact if deployed broadly and early on in a physician's  
4  
5 265 training. An online training module that is widely available, accredited, and inexpensive  
6  
7 266 presents a very promising option. Subsequent studies are needed to evaluate this educational  
8  
9 267 initiative in a broader context. Given the promising findings of the present study, our institution  
10  
11 268 will mandate *Bloody Easy Lite* training for all residents in post-graduate medical education  
12  
13 269 starting June 2019. This pragmatic intervention provides promise for directed learning as a  
14  
15 270 means of turning value-based avoidance statements into meaningful advances in high value  
16  
17 271 healthcare.  
18  
19  
20  
21  
22 272  
23 273  
24  
25  
26  
27  
28  
29  
30  
31  
32  
33  
34  
35  
36  
37  
38  
39  
40  
41  
42  
43  
44  
45  
46  
47  
48  
49  
50  
51  
52  
53  
54  
55  
56  
57  
58  
59  
60

Confidential

1  
2  
3 274 **Acknowledgements:**

4 275  
5 276 We would like to acknowledge the Canadian Society of Internal Medicine's Choosing Wisely  
6 277 Workgroup for their participation in the genesis of this project. We would like to thank the  
7 278 Ontario Regional Blood Coordinating Network for the use of their online education module. We  
8 279 would like to thank Dr. Patricia Pelletier and Ann Wilson from our Blood Bank and Alain Biron  
9 280 from our Department of Performance, Safety and Quality for their assistance in study design,  
10 281 expert hematology review, and with obtaining the relevant data.  
11 282

12 283 *Role of the Funding source*

13  
14 284 Funding was provided by the Royal Victoria Hospital 9C Clinical Teaching Unit Quality  
15  
16 285 Improvement Fund and from the McGill University Health Center Association of Physicians.  
17  
18

19  
20 286 The funders had no role in the design, conduct or reporting.  
21  
22

23 287  
24  
25  
26  
27  
28  
29  
30  
31  
32  
33  
34  
35  
36  
37  
38  
39  
40  
41  
42  
43  
44  
45  
46  
47  
48  
49  
50  
51  
52  
53  
54  
55  
56  
57  
58  
59  
60

288 **Table 1** – Comparison of proportion of transfusions below 80g/L on the intervention and control  
 289 units before and after intervention

290

|                           | MGH    |       |         | RVH    |       |         |
|---------------------------|--------|-------|---------|--------|-------|---------|
|                           | Before | After | p-value | Before | After | p-value |
| Total Transfusions        | 455    | 90    |         | 689    | 176   |         |
| Proportion Below<br>80g/L | 75.6   | 71.1  | 0.37    | 80.1   | 86.9* | 0.04    |
| Patient Days              | 36678  | 10774 |         | 40454  | 11149 |         |
| Admissions                | 2873   | 851   |         | 3829   | 1101  |         |
| Per 1000 Patient Days     | 12.4   | 9.3   | <0.001  | 17.0*  | 17.8* | 0.36    |
| Per 100 Admissions        | 15.8   | 11.9  | <0.001  | 18.0** | 16.0* | 0.16    |

291

292 \* p-value <0.005 for comparison to MGH during same time period. \*\* p=0.03 for comparison to  
 293 MGH during same time period. Any comparison of proportions used Chi-Square and any  
 294 comparison of rates used a Z-test of the rate difference using inverse variance weights.

295

296

## References:

1. Medicine ABol. Choosing Wisely [Available from: [choosingwisely.org](http://choosingwisely.org).
2. Rosenberg A, Agiro A, Gottlieb M, Barron J, Brady P, Liu Y, et al. Early Trends Among Seven Recommendations From the Choosing Wisely Campaign. *JAMA internal medicine*. 2015;175(12):1913-20.
3. Canadian\_Society\_of\_Internal\_Medicine. Internal Medicine: Five Things Physicians and Patients Should Question 2014 [Available from: <http://www.choosingwiselycanada.org/recommendations/internal-medicine/>].
4. Carson JL, Grossman BJ, Kleinman S, Tinmouth AT, Marques MB, Fung MK, et al. Red blood cell transfusion: a clinical practice guideline from the AABB\*. *Annals of internal medicine*. 2012;157(1):49-58.
5. Carson JL, Terrin ML, Noveck H, Sanders DW, Chaitman BR, Rhoads GG, et al. Liberal or restrictive transfusion in high-risk patients after hip surgery. *The New England journal of medicine*. 2011;365(26):2453-62.
6. Hebert PC, Wells G, Blajchman MA, Marshall J, Martin C, Pagliarello G, et al. A multicenter, randomized, controlled clinical trial of transfusion requirements in critical care. Transfusion Requirements in Critical Care Investigators, Canadian Critical Care Trials Group. *The New England journal of medicine*. 1999;340(6):409-17.
7. Villanueva C, Colomo A, Bosch A, Concepcion M, Hernandez-Gea V, Aracil C, et al. Transfusion strategies for acute upper gastrointestinal bleeding. *The New England journal of medicine*. 2013;368(1):11-21.
8. Narvios AB, Lichtiger B, Neumann JL. Underreporting of minor transfusion reactions in cancer patients. *MedGenMed : Medscape general medicine*. 2004;6(2):17.
9. Shander A, Hofmann A, Ozawa S, Theusinger OM, Gombotz H, Spahn DR. Activity-based costs of blood transfusions in surgical patients at four hospitals. *Transfusion*. 2010;50(4):753-65.
10. Carson JL, Carless PA, Hebert PC. Transfusion thresholds and other strategies for guiding allogeneic red blood cell transfusion. *The Cochrane database of systematic reviews*. 2012;4:Cd002042.
11. Spahn DR, Goodnough LT. Alternatives to blood transfusion. *Lancet (London, England)*. 2013;381(9880):1855-65.
12. Goodnough LT, Verbrugge D, Vizmeg K, Riddell Jt. Identifying elective orthopedic surgical patients transfused with amounts of blood in excess of need: the transfusion trigger revisited. *Transfusion*. 1992;32(7):648-53.
13. Shander A, Fink A, Javidroozi M, Erhard J, Farmer SL, Corwin H, et al. Appropriateness of allogeneic red blood cell transfusion: the international consensus conference on transfusion outcomes. *Transfusion medicine reviews*. 2011;25(3):232-46.e53.
14. Ontario Regional Blood Coordinating Network. Bloody Easy Lite for Physicians 2016 [Available from: <http://belite.transfusionontario.org/>].
15. Ontario\_Transfusion\_Quality\_Improvement\_Plan\_Committee. A toolkit for reducing unnecessary red blood cell transfusions in hospitals 2016 [Available from: [http://www.choosingwiselycanada.org/wp-content/uploads/2016/04/CWC\\_Transfusion\\_Toolkit\\_v1.0\\_2016-03-31.pdf](http://www.choosingwiselycanada.org/wp-content/uploads/2016/04/CWC_Transfusion_Toolkit_v1.0_2016-03-31.pdf)].

- 1  
2  
3 341 16. Rothschild JM, McGurk S, Honour M, Lu L, McClendon AA, Srivastava P, et al.  
4 342 Assessment of education and computerized decision support interventions for improving  
5 343 transfusion practice. *Transfusion*. 2007;47(2):228-39.  
6  
7 344 17. Corwin HL, Theus JW, Cargile CS, Lang NP. Red blood cell transfusion: impact of an  
8 345 education program and a clinical guideline on transfusion practice. *J Hosp Med*. 2014;9(12):745-  
9 346 9.  
10  
11 347 18. Goodnough LT, Shieh L, Hadhazy E, Cheng N, Khari P, Maggio P. Improved blood  
12 348 utilization using real-time clinical decision support. *Transfusion*. 2014;54(5):1358-65.  
13  
14 349 19. Wilson K, MacDougall L, Fergusson D, Graham I, Tinmouth A, Hebert PC. The  
15 350 effectiveness of interventions to reduce physician's levels of inappropriate transfusion: what  
16 351 can be learned from a systematic review of the literature. *Transfusion*. 2002;42(9):1224-9.  
17  
18 352 20. Soril LJJ, Noseworthy TW, Dowsett LE, Memedovich K, Holitzki HM, Lorenzetti DL, et al.  
19 353 Behaviour modification interventions to optimise red blood cell transfusion practices: a  
20 354 systematic review and meta-analysis. *BMJ open*. 2018;8(5):e019912.  
21  
22 355 21. Hibbs SP, Nielsen ND, Brunskill S, Doree C, Yazer MH, Kaufman RM, et al. The impact of  
23 356 electronic decision support on transfusion practice: a systematic review. *Transfusion medicine*  
24 357 *reviews*. 2015;29(1):14-23.  
25  
26 358 22. Network ORBC. Ontario Transfusion Quality Improvement Plan Guidance Document for  
27 359 Institutional Implementation 2016 [Available from:  
28 360 [http://transfusionontario.org/en/cmdownloads/categories/quality\\_improvement\\_plan/](http://transfusionontario.org/en/cmdownloads/categories/quality_improvement_plan/).  
29 361

## Supplemental appendix 1 – Pros and Cons of Various Measures of Blood Transfusion Utilization

| Measure                                                                 | Pros                                                                                                                                                                                                                                                                                                                                                    | Cons                                                                                                                                                                                                                                                                                                                            |
|-------------------------------------------------------------------------|---------------------------------------------------------------------------------------------------------------------------------------------------------------------------------------------------------------------------------------------------------------------------------------------------------------------------------------------------------|---------------------------------------------------------------------------------------------------------------------------------------------------------------------------------------------------------------------------------------------------------------------------------------------------------------------------------|
| Overall number of units                                                 | <ul style="list-style-type: none"> <li>Easiest to obtain</li> </ul>                                                                                                                                                                                                                                                                                     | <ul style="list-style-type: none"> <li>Sensitive to the population being measured</li> <li>Not comparable between institutions with different populations</li> <li>Does not assess appropriateness of the transfusion</li> </ul>                                                                                                |
| Transfusions per 1000 patient days                                      | <ul style="list-style-type: none"> <li>Allows standardization and comparison within a unit or institution</li> </ul>                                                                                                                                                                                                                                    | <ul style="list-style-type: none"> <li>Sensitive to the population being measured</li> <li>Not comparable between institutions with different populations</li> <li>Does not assess appropriateness of the transfusion</li> <li>May underestimate overuse in units with low acuity patients and long lengths of stay</li> </ul>  |
| Transfusions per 100 admissions                                         | <ul style="list-style-type: none"> <li>Allows standardization</li> <li>For many services, newly admitted patients are, in general, much more likely to be transfused than long-term patients</li> </ul>                                                                                                                                                 | <ul style="list-style-type: none"> <li>Sensitive to the population being measured</li> <li>Not comparable between institutions with different populations</li> <li>Does not assess appropriateness of the transfusion</li> </ul>                                                                                                |
| Number of single unit transfusions                                      | <ul style="list-style-type: none"> <li>Addresses appropriateness and supports campaigns such as Choosing Wisely Canada's "why use two when one will do?"</li> <li>Eliminating routine orders to transfuse two units will reduce overuse</li> </ul>                                                                                                      | <ul style="list-style-type: none"> <li>Does not address the appropriateness of the first transfusion given or of single unit transfusions</li> <li>Not always straightforward to electronically collect this type of data particularly when the transfused units occur on two calendar days (i.e. pre/post-midnight)</li> </ul> |
| Proportion of transfusions with hemoglobin below 80g/L (or other value) | <ul style="list-style-type: none"> <li>Allows for internal and external comparisons which are independent of case mix</li> <li>Addresses appropriateness and can be used in goal setting for an institution e.g. "80% below 80"</li> <li>Sensitivity and specificity of potential overuse can be adjusted by changing the hemoglobin cut-off</li> </ul> | <ul style="list-style-type: none"> <li>More difficult to obtain in some centers because it requires both transfusion and laboratory data</li> <li>Can be confused with stating that 80g/L is the clinical threshold for transfusions</li> </ul>                                                                                 |
| Proportion of appropriate transfusions                                  | <ul style="list-style-type: none"> <li>Allows for internal and external comparisons which are independent of case mix</li> <li>Addresses appropriateness</li> </ul>                                                                                                                                                                                     | <ul style="list-style-type: none"> <li>Requires expert adjudication</li> <li>Time consuming and impossible to automate</li> <li>Comparisons highly dependent on inter-observer reliability</li> </ul>                                                                                                                           |
